# Supplementary material
Source: PubMed Central journal article supplement (PMC3457516)
Supplement: AEM.01460-12_zam999103689so1.pdf [file AEM.01460-12_zam999103689so1.pdf]

Figure S1

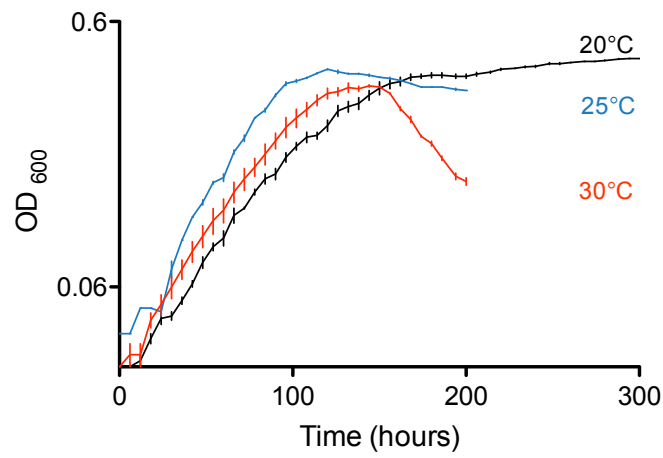

**Figure 1.** Temperature effect on *G. fermentans* growth. Slow growth was seen at all three temperatures with 25°C (blue) growing the fastest. Rapid growth and cell lysis was seen when *G. fermentans* was grown at 30°C (red). Sustained growth over time without any cell lysis was seen in cultures grown at 20°C (black) and hence used for all the subsequent experiments.
